# Supplementary material
Source: Springer Nature journal article supplement (https://www.springermedizin.de/resource/supplementary/12882_2011_322_MOESM2_ESM.pdf/9453630)

**iFGF23  
pg/ml**

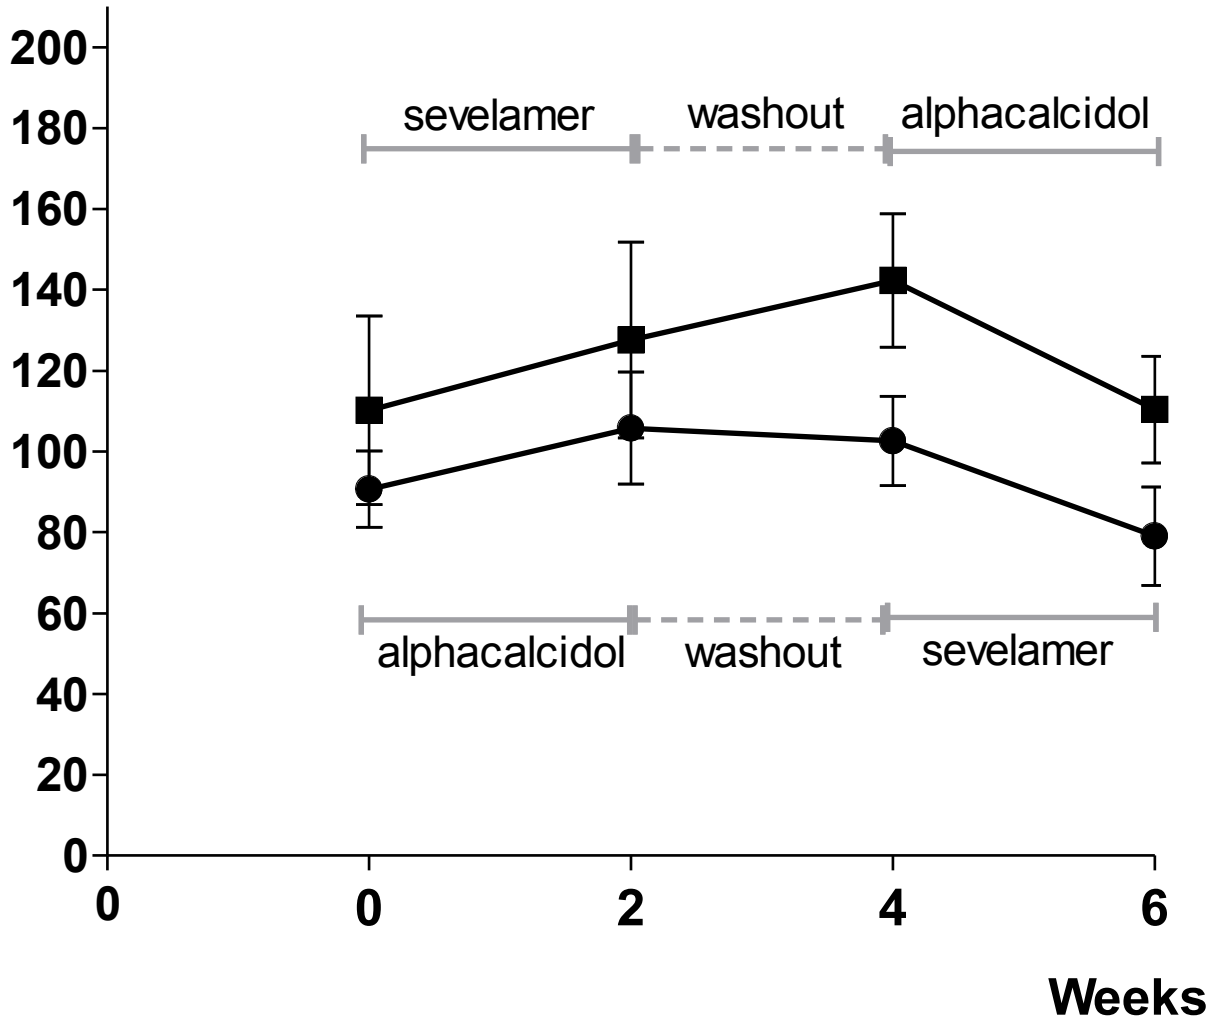

Group-2

Group-1

Supplement: MOESM2 [file 9453630]
